# Supplementary material for: Dynamic diversity of SARS-CoV-2 genetic mutations in a lung transplantation patient with persistent COVID-19
Source: PubMed Central journal article supplement (PMC11058237; doi:10.1038/s41467-024-47941-x), 2024-04-29
Supplement: 41467_2024_47941_MOESM1_ESM.pdf [file 41467_2024_47941_MOESM1_ESM.pdf]

# Supplementary

## Table

**Supplementary Table 1 Frequency of genetic and amino acid mutations in SARS-CoV-2**

| Nucleotide mutation | Amino acid mutation                         | Day 22 | Day 29 | Day 36 | Day 62 | Day 75 | Day 78 | Day 83 | Day 86 |
|---------------------|---------------------------------------------|--------|--------|--------|--------|--------|--------|--------|--------|
| 510_518del          | ORF1a:InflameDeletion                       | NA     | NA     | 0.09   | NA     | NA     | NA     | NA     | NA     |
| G587A               | ORF1a:V108I (nsp1:V108I)                    | NA     | NA     | NA     | NA     | 0.05   | NA     | NA     | NA     |
| T670G               | ORF1a:S135R (nsp1:S135R)                    | 1      | 1      | 1      | 1      | 1      | 1      | 1      | 1      |
| A752T               | ORF1a:T163S (nsp1:T163S)                    | NA     | NA     | 0.05   | NA     | NA     | NA     | NA     | NA     |
| C882T               | ORF1a:A206V (nsp2:A26V)                     | NA     | NA     | NA     | NA     | 0.06   | NA     | NA     | NA     |
| A1007C              | ORF1a:S248R (nsp2:S68R)                     | NA     | NA     | NA     | NA     | NA     | NA     | NA     | 0.11   |
| T1104C              | ORF1a:I280T (nsp2:I100T)                    | NA     | 0.1    | NA     | NA     | NA     | NA     | NA     | NA     |
| A1631G              | ORF1a:K456E (nsp2:K276E)                    | NA     | NA     | 0.06   | NA     | NA     | NA     | NA     | NA     |
| G2076A              | ORF1a:G604D (nsp2:G424D)                    | NA     | 0.05   | NA     | NA     | NA     | NA     | NA     | NA     |
| C2790T              | ORF1a:T842I (nsp3:T24I)                     | 1      | 1      | 1      | 1      | 1      | 1      | 1      | 1      |
| A3126G              | ORF1a:D954G (nsp3:D136G)                    | NA     | NA     | NA     | NA     | 0.05   | NA     | NA     | NA     |
| G3155A              | ORF1a:A964T (nsp3:A146T)                    | NA     | NA     | 0.06   | NA     | NA     | NA     | NA     | NA     |
| C3290G              | ORF1a:Q1009E (nsp3:Q191E)                   | 0.03   | NA     | 0.05   | NA     | NA     | 0.04   | NA     | NA     |
| A3542G              | ORF1a:T1093A (nsp3:T275A)                   | NA     | 0.04   | 0.04   | 0.06   | NA     | NA     | NA     | NA     |
| A3637T              | ORF1a:K1124N (nsp3:K306N)                   | NA     | NA     | NA     | NA     | NA     | NA     | NA     | 0.23   |
| G3998A              | ORF1a:E1245K (nsp3:E427K)                   | NA     | NA     | NA     | NA     | 0.07   | NA     | 0.04   | 0.23   |
| G4184A              | ORF1a:G1307S (nsp3:G489S)                   | 1      | 1      | 1      | 1      | 1      | 1      | 1      | 1      |
| C4296T              | ORF1a:T1344I (nsp3:T526I)                   | NA     | NA     | 0.05   | NA     | NA     | NA     | NA     | NA     |
| T4968C              | ORF1a:I1568T (nsp3:I750T)                   | NA     | NA     | NA     | 0.1    | NA     | NA     | NA     | NA     |
| T5119A              | ORF1a:F1618L (nsp3:F800L)                   | 0.04   | NA     | 0.05   | 0.04   | NA     | 0.04   | 0.04   | NA     |
| T5120A              | ORF1a:Y1619N (nsp3:Y801N)                   | 0.04   | NA     | 0.05   | 0.04   | NA     | 0.04   | 0.04   | NA     |
| C6636T              | ORF1a:T2124I (nsp3:T1306I)                  | NA     | NA     | NA     | 0.91   | 1      | 1      | 1      | 1      |
| G7498A              | ORF1a:M2411I (nsp3:M1593I)                  | NA     | NA     | NA     | NA     | NA     | NA     | 0.09   | NA     |
| G7791T              | ORF1a:G2509V (nsp3:G1691V)                  | NA     | NA     | NA     | 0.14   | 0.19   | 0.07   | 0.42   | NA     |
| G8178A              | ORF1a:R2638Q (nsp3:R1820Q)                  | NA     | NA     | NA     | NA     | NA     | NA     | NA     | 0.07   |
| C8802A              | ORF1a:T2846N (nsp4:T83N)                    | NA     | NA     | NA     | NA     | NA     | NA     | 0.07   | 0.71   |
| C9344T              | ORF1a:L3027F (nsp4:L264F)                   | 1      | 0.99   | 1      | 1      | 0.99   | 1      | 1      | 1      |
| C9534T              | ORF1a:T3090I (nsp4:T327I)                   | 1      | 1      | 1      | 1      | 1      | 1      | 1      | 1      |
| C10029T             | ORF1a:T3255I (nsp4:T492I)                   | 1      | 1      | 1      | 1      | 1      | 1      | 1      | 1      |
| C10449A             | ORF1a:P3395H (nsp5:P132H)                   | 1      | 1      | 1      | 1      | 1      | 1      | 1      | 1      |
| 11075insT           | ORF1a:flameshift                            | NA     | 0.03   | 0.06   | 0.04   | NA     | NA     | 0.04   | NA     |
| 11075del            | ORF1a:flameshift                            | NA     | NA     | NA     | 0.05   | 0.04   | NA     | NA     | 0.04   |
| 11288_11296del      | ORF1a:S3675_F3677del<br>(nsp6:S106_F108del) | 0.72   | 0.73   | 0.7    | 0.75   | 0.73   | 0.76   | 0.76   | 0.82   |
| C11442T             | ORF1a:A3726V (nsp6:A157V)                   | 1      | 1      | 1      | 1      | 1      | 1      | 1      | 1      |
| G11743T             | ORF1a:Q3826H (nsp6:Q257H)                   | NA     | NA     | NA     | 0.1    | NA     | NA     | NA     | NA     |
| C12756T             | ORF1a:T4164I (nsp9:T24I)                    | 0.08   | NA     | NA     | NA     | NA     | NA     | NA     | NA     |
| C12789T             | ORF1a:T4175I (nsp9:T35I)                    | NA     | NA     | 0.11   | NA     | NA     | NA     | NA     | NA     |

Continued

| Nucleotide mutation | Amino acid mutation        | Day 22 | Day 29 | Day 36 | Day 62 | Day 75 | Day 78 | Day 83 | Day 86 |
|---------------------|----------------------------|--------|--------|--------|--------|--------|--------|--------|--------|
| T13924G             | ORF1b:W153G (nsp12:W162G)  | NA     | NA     | 0.09   | 0.04   | NA     | NA     | NA     | NA     |
| A13928T             | ORF1b:Y154F (nsp12:Y163F)  | NA     | NA     | 0.11   | 0.05   | NA     | NA     | NA     | NA     |
| A14359C             | ORF1b:I298L (nsp12:I307L)  | NA     | NA     | NA     | NA     | 0.5    | 0.59   | NA     | NA     |
| C14408T             | ORF1b:P314L (nsp12:P323L)  | 1      | 1      | 1      | 1      | 1      | 1      | 1      | 1      |
| G14831A             | ORF1b:C455Y (nsp12:C464Y)  | 0.05   | 0.03   | NA     | NA     | NA     | NA     | NA     | NA     |
| G14831T             | ORF1b:C455F (nsp12:C464F)  | 0.05   | NA     | NA     | NA     | NA     | NA     | NA     | NA     |
| T14996C             | ORF1b:M510T (nsp12:M519T)  | NA     | NA     | 0.06   | NA     | NA     | NA     | NA     | NA     |
| G15451A             | ORF1b:G662S (nsp12:G671S)  | NA     | NA     | NA     | 0.92   | 1      | 1      | 1      | 1      |
| T15682A             | ORF1b:Y739N (nsp12:Y748N)  | NA     | NA     | 0.04   | 0.05   | NA     | NA     | NA     | 0.04   |
| T15685A             | ORF1b:L740M (nsp12:L749M)  | NA     | NA     | 0.05   | 0.06   | NA     | 0.03   | 0.03   | 0.03   |
| G15769T             | ORF1b:A768S (nsp12:A777S)  | 0.16   | NA     | NA     | NA     | NA     | NA     | NA     | NA     |
| G15814A             | ORF1b:V783I (nsp12:V792I)  | 0.26   | 0.31   | NA     | NA     | NA     | NA     | NA     | NA     |
| G15822A             | ORF1b:M785I (nsp12:M794I)  | NA     | NA     | 0.06   | 0.04   | NA     | NA     | NA     | NA     |
| G15822T             | ORF1b:M785I (nsp12:M794I)  | NA     | NA     | 0.51   | NA     | NA     | NA     | NA     | NA     |
| T15835C             | ORF1b:C790R (nsp12:C799R)  | NA     | 0.05   | 0.05   | NA     | NA     | NA     | NA     | NA     |
| G15836T             | ORF1b:C790F (nsp12:C799F)  | NA     | 0.58   | 0.14   | 0.96   | 1      | 1      | 1      | 1      |
| T15877C             | ORF1b:C804R (nsp12:C813R)  | NA     | NA     | 0.05   | NA     | NA     | NA     | NA     | NA     |
| C16289A             | ORF1b:A941D (nsp13:A18D)   | NA     | NA     | 0.09   | NA     | NA     | NA     | NA     | NA     |
| C16289T             | ORF1b:A941V (nsp13:A18V)   | NA     | NA     | NA     | 0.92   | 1      | 1      | 1      | 1      |
| G16411T             | ORF1b:D982Y (nsp13:D59Y)   | NA     | NA     | 0.07   | NA     | NA     | NA     | NA     | NA     |
| A16412C             | ORF1b:D982A (nsp13:D59A)   | NA     | NA     | 0.08   | NA     | NA     | NA     | NA     | NA     |
| T16456G             | ORF1b:S997A (nsp13:S74A)   | NA     | NA     | 0.07   | NA     | NA     | NA     | NA     | NA     |
| C16604T             | ORF1b:A1046V (nsp13:A123V) | NA     | NA     | 0.06   | NA     | NA     | NA     | NA     | NA     |
| 16814del            | ORF1b:flameshift           | NA     | NA     | 0.05   | NA     | NA     | NA     | NA     | NA     |
| C16936T             | ORF1b:P1157S (nsp13:P234S) | NA     | NA     | NA     | NA     | NA     | NA     | 0.1    | NA     |
| T17041A             | ORF1b:Y1192N (nsp13:Y269N) | NA     | NA     | 0.06   | NA     | NA     | NA     | NA     | NA     |
| T17051C             | ORF1b:V1195A (nsp13:V272A) | NA     | NA     | 0.06   | NA     | NA     | NA     | NA     | NA     |
| T17224C             | ORF1b:C1253R (nsp13:C330R) | NA     | NA     | 0.07   | NA     | NA     | NA     | NA     | NA     |
| G17338T             | ORF1b:A1291S (nsp13:A368S) | NA     | NA     | NA     | NA     | 0.12   | 0.03   | 0.3    | 0.88   |
| C17410T             | ORF1b:R1315C (nsp13:R392C) | 1      | 1      | 1      | 1      | 1      | 1      | 1      | 1      |
| A18163G             | ORF1b:I1566V (nsp14:I42V)  | 1      | 1      | 1      | 0.05   | NA     | NA     | NA     | NA     |
| C18265T             | ORF1b:R1600C (nsp14:R76C)  | NA     | NA     | NA     | 0.92   | 1      | 1      | 1      | 1      |
| C19955T             | ORF1b:T2163I (nsp15:T112I) | 1      | 1      | 1      | 1      | 1      | 1      | 1      | 1      |
| G20173A             | ORF1b:V2236I (nsp15:V185I) | NA     | NA     | NA     | 0.24   | 0.1    | 0.11   | 0.23   | 0.85   |
| G20326A             | ORF1b:V2287I (nsp15:V236I) | NA     | NA     | NA     | NA     | 0.53   | 0.68   | 0.05   | NA     |
| 21102insT           | ORF1b:flameshift           | 0.05   | NA     | NA     | NA     | 0.05   | NA     | NA     | 0.06   |
| C21618T             | S:T19I                     | 1      | 1      | 0.99   | 1      | 1      | 1      | 1      | 1      |
| 21633_21641del      | S:L24_P26del               | 0.73   | 0.72   | 0.8    | 0.75   | 0.81   | 0.79   | 0.84   | 0.85   |
| G21641T             | S:A27S                     | 1      | 1      | 1      | 1      | 1      | 1      | 1      | 1      |
| T21656C             | S:F32L                     | NA     | NA     | NA     | 0.18   | NA     | NA     | NA     | NA     |
| 21765_21770del      | S:H69_V70del               | 0.75   | 0.67   | 0.72   | 0.74   | 0.73   | 0.76   | 0.79   | 0.87   |
| G21800T             | S:D80Y                     | NA     | NA     | NA     | NA     | NA     | NA     | NA     | 0.06   |
| G21830T             | S:V90F                     | NA     | NA     | 0.05   | NA     | NA     | NA     | NA     | NA     |
| G21987A             | S:G142D                    | 1      | 1      | 1      | 1      | 0.99   | 1      | 1      | 1      |
| 21992_21994del      | S:Y144del                  | NA     | NA     | NA     | 0.82   | 0.78   | 0.79   | 0.83   | 0.87   |

Continued

| Nucleotide mutation | Amino acid mutation | Day 22 | Day 29 | Day 36 | Day 62 | Day 75 | Day 78 | Day 83 | Day 86 |
|---------------------|---------------------|--------|--------|--------|--------|--------|--------|--------|--------|
| T22092A             | S:M177K             | NA     | NA     | NA     | NA     | NA     | 0.04   | 0.27   | 0.8    |
| G22100A             | S:E180K             | NA     | NA     | NA     | NA     | 0.06   | 0.08   | NA     | NA     |
| G22103C             | S:G181R             | NA     | NA     | NA     | NA     | NA     | 0.08   | NA     | 0.18   |
| G22103A             | S:G181R             | NA     | NA     | NA     | NA     | 0.52   | 0.65   | 0.07   | NA     |
| T22200G             | S:V213G             | 1      | 1      | 1      | 1      | 1      | 1      | 1      | 1      |
| G22203T             | S:R214L             | NA     | NA     | NA     | 0.93   | 1      | 1      | 1      | 1      |
| C22448T             | S:L296F             | NA     | NA     | NA     | NA     | NA     | NA     | 0.05   | NA     |
| C22550T             | S:P330S             | NA     | NA     | 0.14   | NA     | NA     | NA     | NA     | NA     |
| G22578A             | S:G339D             | 1      | 1      | 1      | 1      | 1      | 1      | 1      | 1      |
| G22599C             | S:R346T             | NA     | NA     | NA     | 1      | 1      | 1      | 1      | 1      |
| T22667C             | S:Y369H             | NA     | NA     | 0.1    | NA     | NA     | NA     | NA     | NA     |
| C22674T             | S:S371F             | 1      | 1      | 1      | 0.99   | 1      | 1      | 1      | 1      |
| T22679C             | S:S373P             | 1      | 0.99   | 1      | 1      | 1      | 1      | 1      | 1      |
| C22686T             | S:S375F             | 1      | 0.99   | 0.99   | 1      | 1      | 1      | 0.99   | 1      |
| A22688G             | S:T376A             | 1      | 1      | 0.99   | 1      | 1      | 1      | 1      | 1      |
| A22728G             | S:D389G             | NA     | NA     | NA     | 0.49   | 0.85   | 0.97   | 0.73   | 0.16   |
| G22775A             | S:D405N             | 0.98   | 0.89   | 0.95   | 1      | 1      | 1      | 1      | 1      |
| A22786C             | S:R408S             | 0.93   | 0.93   | 0.93   | 0.93   | 0.94   | 0.93   | 0.92   | 0.93   |
| G22813T             | S:K417N             | 1      | 1      | 1      | 1      | 0.99   | 1      | 1      | 1      |
| T22882G             | S:N440K             | 1      | 1      | 0.99   | 1      | 1      | 1      | 1      | 1      |
| T22917G             | S:L452R             | 1      | 1      | 1      | 0.99   | 0.99   | 1      | 0.99   | 1      |
| G22992A             | S:S477N             | 1      | 1      | 1      | 1      | 1      | 1      | 1      | 1      |
| C22995A             | S:T478K             | 1      | 1      | 1      | 1      | 1      | 1      | 1      | 1      |
| A23013C             | S:E484A             | 1      | 1      | 1      | 1      | 1      | 1      | 1      | 0.99   |
| T23018G             | S:F486V             | 1      | 1      | 0.98   | 0.05   | NA     | NA     | NA     | NA     |
| A23055G             | S:Q498R             | 1      | 1      | 1      | 1      | 1      | 0.99   | 0.99   | 1      |
| A23063T             | S:N501Y             | 1      | 0.99   | 1      | 1      | 1      | 1      | 1      | 1      |
| G23072A             | S:G504S             | NA     | NA     | 0.06   | NA     | NA     | NA     | NA     | NA     |
| G23073A             | S:G504D             | NA     | 0.31   | NA     | NA     | NA     | NA     | NA     | NA     |
| T23075C             | S:Y505H             | 1      | 0.99   | 1      | 0.99   | 1      | 0.99   | 1      | 1      |
| C23202A             | S:T547K             | NA     | NA     | NA     | NA     | 0.15   | NA     | 0.26   | 0.82   |
| A23403G             | S:D614G             | 0.99   | 1      | 0.99   | 1      | 0.99   | 1      | 1      | 1      |
| G23405T             | S:V615F             | NA     | NA     | NA     | NA     | NA     | NA     | 0.07   | NA     |
| G23463T             | S:R634L             | NA     | NA     | NA     | 0.23   | 0.16   | NA     | 0.27   | 0.83   |
| G23463A             | S:R634H             | NA     | NA     | NA     | 0.1    | NA     | NA     | NA     | NA     |
| T23487G             | S:V642G             | NA     | NA     | NA     | 0.46   | 0.82   | 0.97   | 0.74   | 0.17   |
| C23525T             | S:H655Y             | 1      | 1      | 1      | 0.99   | 1      | 1      | 1      | 1      |
| C23589A             | S:T676N             | NA     | NA     | NA     | 0.92   | 1      | 1      | 1      | 1      |
| A23592C             | S:Q677P             | NA     | NA     | NA     | 0.08   | NA     | NA     | NA     | NA     |
| A23598G             | S:N679S             | NA     | NA     | NA     | NA     | NA     | NA     | NA     | 0.16   |
| T23599G             | S:N679K             | 1      | 1      | 1      | 0.99   | 1      | 1      | 1      | 1      |
| C23604A             | S:P681H             | 1      | 1      | 1      | 1      | 1      | 1      | 1      | 1      |
| C23854A             | S:N764K             | 1      | 1      | 1      | 1      | 1      | 1      | 1      | 1      |
| G23948T             | S:D796Y             | 1      | 1      | 1      | 1      | 0.99   | 1      | 1      | 1      |
| C24117T             | S:A852V             | NA     | NA     | NA     | 0.08   | NA     | NA     | 0.28   | 0.9    |

Continued

| Nucleotide mutation | Amino acid mutation | Day 22 | Day 29 | Day 36 | Day 62 | Day 75 | Day 78 | Day 83 | Day 86 |
|---------------------|---------------------|--------|--------|--------|--------|--------|--------|--------|--------|
| A24424T             | S:Q954H             | 1      | 1      | 1      | 1      | 0.99   | 1      | 1      | 1      |
| T24469A             | S:N969K             | 1      | 1      | 1      | 1      | 1      | 1      | 0.99   | 1      |
| G25145A             | S:E1195K            | NA     | NA     | NA     | 0.94   | 1      | 1      | 1      | 1      |
| A25325T             | S:K1255*            | NA     | NA     | 0.06   | 0.05   | NA     | NA     | NA     | NA     |
| G25352C             | S:V1264L            | NA     | NA     | NA     | NA     | NA     | NA     | 0.05   | NA     |
| G25690C             | ORF3a:G100R         | NA     | NA     | NA     | NA     | NA     | NA     | 0.05   | NA     |
| C26060T             | ORF3a:T223I         | 1      | 1      | 1      | 1      | 1      | 1      | 1      | 1      |
| C26270T             | E:T9I               | 1      | 1      | 1      | 1      | 1      | 1      | 1      | 1      |
| G26529A             | M:D3N               | 1      | 1      | 1      | 1      | 1      | 1      | 1      | 1      |
| C26577G             | M:Q19E              | 0.99   | 1      | 1      | 1      | 1      | 1      | 1      | 1      |
| G26709A             | M:A63T              | 1      | 1      | 1      | 1      | 1      | 1      | 1      | 1      |
| T27242C             | ORF6:I14T           | NA     | NA     | NA     | NA     | NA     | NA     | 0.05   | NA     |
| G27463A             | ORF7a:V24I          | NA     | 0.39   | NA     | NA     | NA     | NA     | NA     | NA     |
| C27999T             | ORF8:P36S           | NA     | NA     | NA     | NA     | NA     | NA     | 0.69   | NA     |
| C28087A             | ORF8:A65D           | NA     | NA     | NA     | NA     | 0.6    | 0.87   | 0.04   | NA     |
| C28311T             | N:P13L              | 1      | 1      | 1      | 1      | 1      | 1      | 1      | 1      |
| 28362_28370del      | N:E31_S32del        | 0.68   | 0.71   | 0.7    | 0.71   | 0.7    | 0.74   | 0.77   | 0.86   |
| G28881A             | N:R203K             | 1      | 1      | 1      | 1      | 1      | 1      | 1      | 1      |
| G28883C             | N:G204R             | 1      | 1      | 1      | 1      | 1      | 1      | 1      | 1      |
| A29039T             | N:K256*             | 0.04   | 0.05   | NA     | 0.05   | 0.05   | 0.08   | NA     | 0.03   |
| C29085T             | N:T271I             | NA     | NA     | NA     | NA     | NA     | NA     | 0.06   | 0.78   |
| G29384C             | N:D371H             | NA     | NA     | 0.03   | 0.08   | 0.08   | 0.06   | 0.05   | 0.11   |
| A29510C             | N:S413R             | 1      | 1      | 1      | 1      | 1      | 1      | 1      | 1      |

In this table, all mutations with a frequency of 5% or higher as determined using whole genome sequencing are listed.

NA: Not applicable

**Supplementary Table 2 Primers used for the SARS-CoV-2 whole-genome sequencing**

| Name               | Sequence                          | Region      | Pool |
|--------------------|-----------------------------------|-------------|------|
| Sc2Wgs2kb_1_LEFT   | 5'-ACCAACCAACTTTTCGATCTCTTGT-3'   | 30–54       | 1    |
| Sc2Wgs2kb_1_RIGHT  | 5'-CCAATCAAGGACGGGTTTGAGT-3'      | 2133–2155   | 1    |
| Sc2Wgs2kb_2_LEFT   | 5'-TCACTGAGACTCATTGATGCTATGA-3'   | 1993–2018   | 2    |
| Sc2Wgs2kb_2_RIGHT  | 5'-ACCCTCTTGAACAACATCACCC-3'      | 4125–4147   | 2    |
| Sc2Wgs2kb_3_LEFT   | 5'-TGGAAGAACTAAGTTCCTCACAGA-3'    | 3992–4017   | 3&4  |
| Sc2Wgs2kb_3_RIGHT  | 5'-ATCAATAGCCACCACATCACCA-3'      | 6156–6178   | 3&4  |
| Sc2Wgs2kb_4_LEFT   | 5'-CCAACCATATCCAAACGCAAGC-3'      | 6015–6037   | 1    |
| Sc2Wgs2kb_4_RIGHT  | 5'-GCAAGTTCAGCTTCTGCAGTTG-3'      | 8105–8127   | 1    |
| Sc2Wgs2kb_5_LEFT   | 5'-TGATAGTGC GGAAGTTGCAGTT-3'     | 8007–8029   | 2    |
| Sc2Wgs2kb_5_RIGHT  | 5'-ACCCTCAACTTTACCAGATGGG-3'      | 10077–10099 | 2    |
| Sc2Wgs2kb_6_LEFT   | 5'-TCTCGCAAAGGCTCTCAATGAC-3'      | 9963–9985   | 3    |
| Sc2Wgs2kb_6_RIGHT  | 5'-AGCTTGTAAGTTGCCCTGTTG-3'       | 12072–12094 | 3    |
| Sc2Wgs2kb_7_LEFT   | 5'-GGGCTCAATGTGTCCAGTTACA-3'      | 11927–11949 | 1    |
| Sc2Wgs2kb_7_RIGHT  | 5'-CAATACCAGCATTTCCGCATGGC-3'     | 14022–14044 | 1    |
| Sc2Wgs2kb_8_LEFT   | 5'-GGACTGGTATGATTTTGTAGAAAACCC-3' | 13919–13946 | 2    |
| Sc2Wgs2kb_8_RIGHT  | 5'-AGCTAAGACACGAACCGTTCA-3'       | 16007–16029 | 2    |
| Sc2Wgs2kb_9_LEFT   | 5'-AGGACCTCATGAATTTTGCTCTCA-3'    | 15860–15884 | 3    |
| Sc2Wgs2kb_9_RIGHT  | 5'-CCTACGTGGAATTTCAAGACTTGT-3'    | 17997–18021 | 3    |
| Sc2Wgs2kb_10_LEFT  | 5'-ACCACTGAAACAGCTCACTCTT-3'      | 17880–17902 | 1    |
| Sc2Wgs2kb_10_RIGHT | 5'-AGTGAGTGGTGCACAAATCGTT-3'      | 19958–19980 | 1    |
| Sc2Wgs2kb_11_LEFT  | 5'-GGGTGTGGACATTGCTGCTAAT-3'      | 19844–19866 | 2    |
| Sc2Wgs2kb_11_RIGHT | 5'-CAATAAGTAGGGACTGGGTCTTCG-3'    | 21896–21920 | 2    |
| Sc2Wgs2kb_12_LEFT  | 5'-TGTCTCTGGGACCAATGGTACT-3'      | 21768–21790 | 3&4  |
| Sc2Wgs2kb_12_RIGHT | 5'-TGTGCAAAAACCTTCTGGGTGT-3'      | 23891–23913 | 3&4  |
| Sc2Wgs2kb_13_LEFT  | 5'-TGTGGTGATTCAACTGAATGCAG-3'     | 23788–23811 | 1    |
| Sc2Wgs2kb_13_RIGHT | 5'-AGTCGTAACAATTAGTATGCCAGCA-3'   | 25833–25858 | 1    |
| Sc2Wgs2kb_14_LEFT  | 5'-GCCTTGAAGCCCCTTTTCTCTA-3'      | 25690–25712 | 2    |
| Sc2Wgs2kb_14_RIGHT | 5'-AGCAGAAAGGCTAAAAAGCACAA-3'     | 27785–27808 | 2    |
| Sc2Wgs2kb_15_LEFT  | 5'-ACTGTTTCATCAGACAAGAGGAAGT-3'   | 27647–27671 | 3    |
| Sc2Wgs2kb_15_RIGHT | 5'-ATAGGCAGCTCTCCCTAGCATT-3'      | 29769–29791 | 3    |

## Figure

**Supplementary Figure 1** Number of amino acid mutations observed during the second and third round of RDV administration.

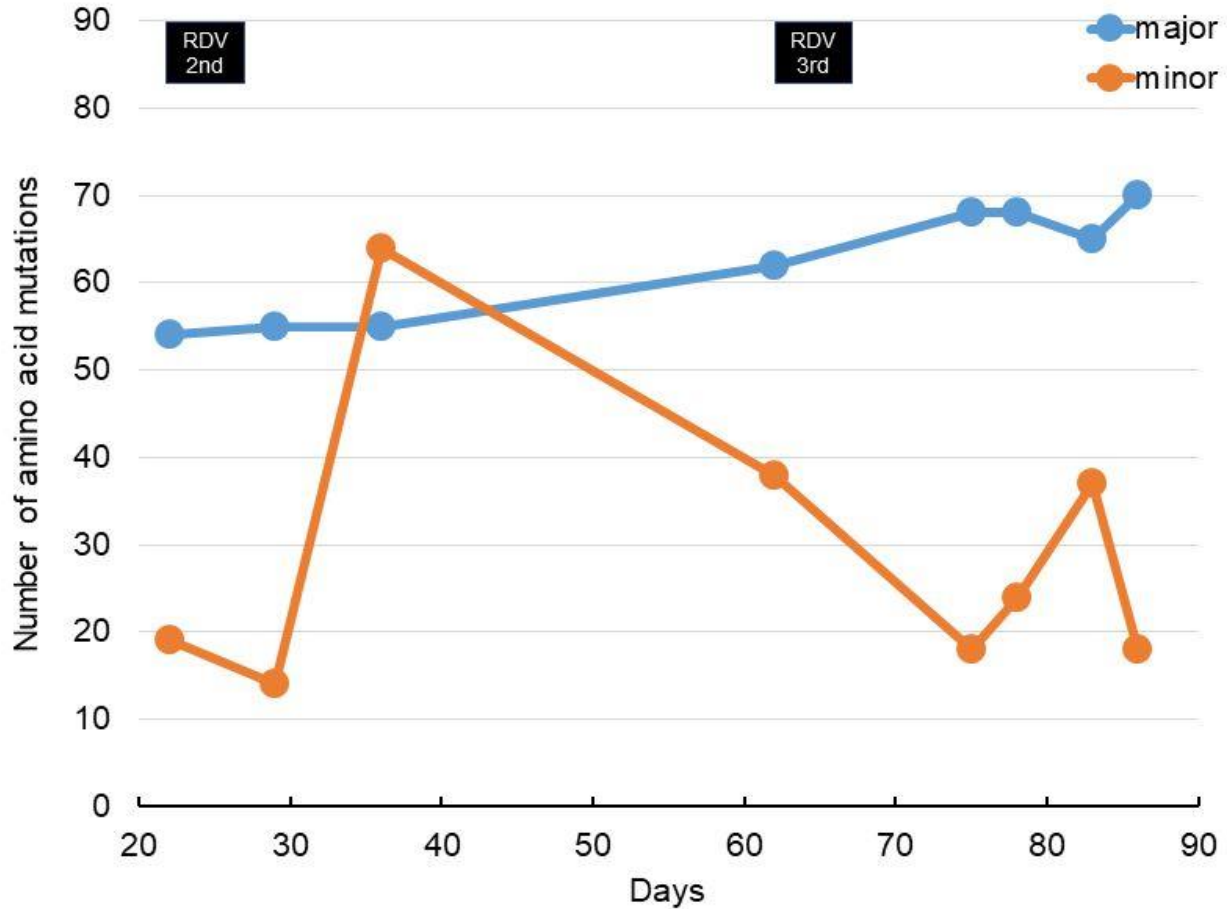

The amino acid mutations compared with those in the index strain of SARS-CoV-2 (NC\_045512.2, Pango lineage B) were categorized as major and minor based on a frequency of more and less than 50%, respectively. All mutations with a frequency of 5% or higher are shown.

The number of minor mutations reached a maximum of 64 on Day 36 and decreased thereafter. It should be noted that minor mutations were observed to increase within two to three weeks of the start of both the second and third RDV administration. Most of the minor mutations were thereafter eliminated, but some, such as C799F, persisted to become major mutations.

RDV: Remdesivir

**Supplementary Figure 2 Comparison of RDV sensitivity of CH-LT4 and later isolates with that of CH-LT1**

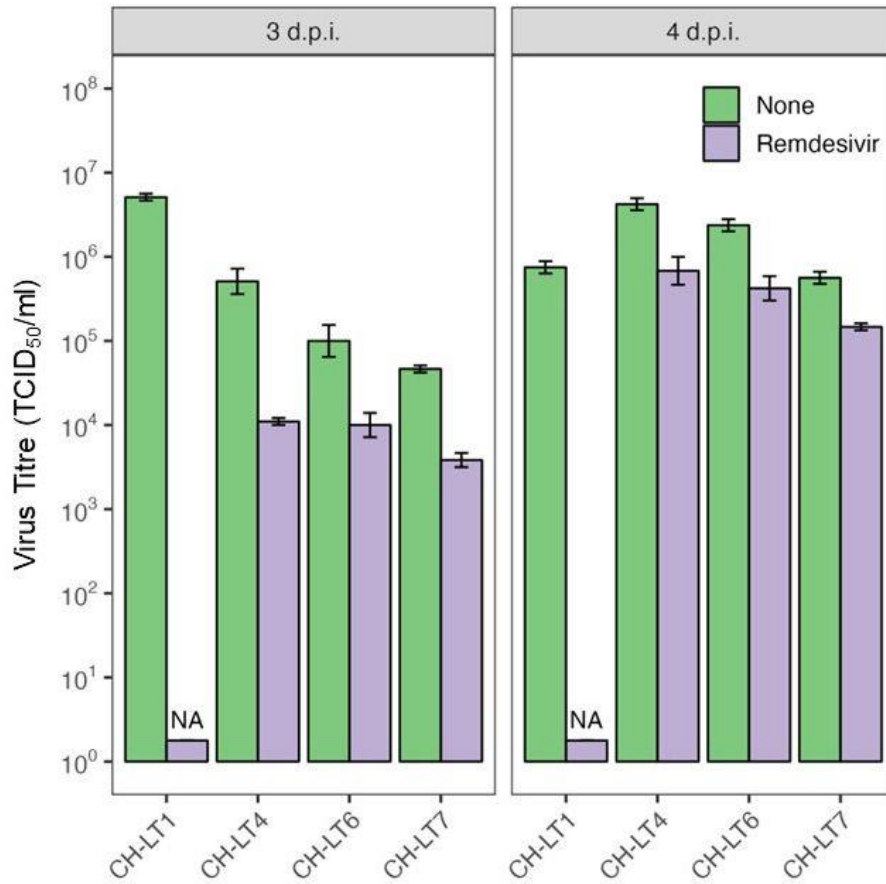

To examine whether CH-LT4 and later isolates still possess the RDV resistance or not, we performed the comparison experiments of the later isolates with the original isolate CH-LT1 in the presence or absence of 5 $\mu$ M RDV at two fixed points: 3 and 4 d.p.i. CH-LT4 and later isolates could propagate at least to some extent (approximately one order) in the presence of 5 $\mu$ M RDV whereas CH-LT1 was suppressed to undetectable level. NA means not applicable (detection limit was 10 TCID<sub>50</sub>/mL). Error bars indicate standard errors (SE).

RDV: Remdesivir

### Supplementary Figure 3 Chemical structures of RDV-TP and ATP

a. Remdesivir-triphosphate (RDV-TP)

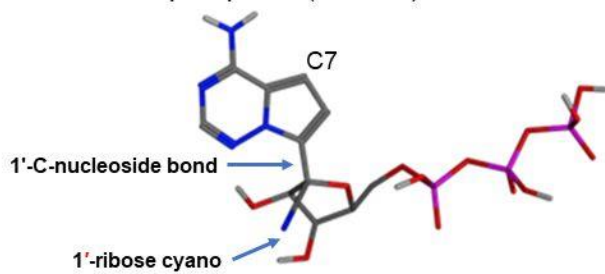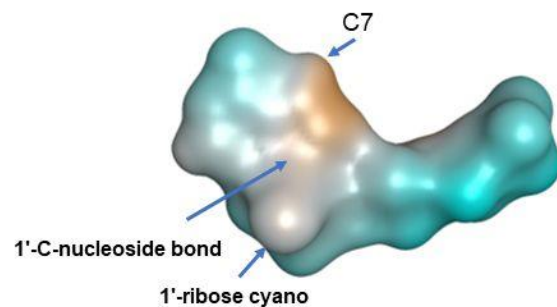

b. Adenosine-triphosphate (ATP)

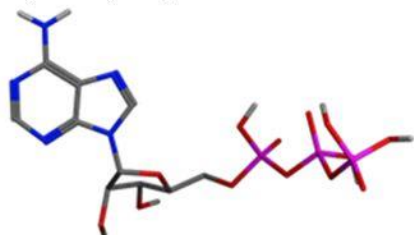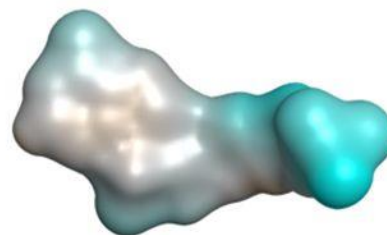

a. Remdesivir-triphosphate (RDV-TP).

b. Adenosine-triphosphate (ATP).

Left: stick model, Right: Space-filling model, Cyan: hydrophilic, Orange: hydrophobic.



## Supplementary information

### The iVar commands for whole genome sequencing

# Preprocessing with fastp

```
fastp -i read1.fastq.gz -l read2.fastq.gz -o read1.fastp.fastq.gz -O read2.fastp.fastq.gz -f 1 -F 1 -t 1 -T 1
```

# Mapping to a reference genome with BWA

```
bwa mem NC_045512.fasta read1.fastp.fastq.gz read2.fastp.fastq.gz | samtools view -b -q 1 | samtools sort -o sample.sorted.bam
```

```
samtools index sample.sorted.bam
```

# Trim primer sequences with iVar

```
ivar trim -b PrimerRegion.bed -p sample.sorted.trimmed.bam -i sample.sorted.bam -e
```

```
samtools sort -o sample.sorted.trimmed.sorted.bam sample.sorted.trimmed.bam
```

```
samtools index sample.sorted.trimmed.sorted.bam
```

# Call variants with iVar

```
samtools mpileup -B -q 1 sample.sorted.trimmed.sorted.bam | ivar variants -p iVarVariants -q 20 -t 0.03 -r NC_045512.fasta -g NC_045512.gff
```

# Generate a consensus sequence with iVar

```
samtools mpileup -B -q 1 sample.sorted.trimmed.sorted.bam | ivar consensus -p ConsensusSeq -q 20 -t 0
```

### The commands for phylogenetic analysis

# Multiple sequence alignment by MAFFT

```
mafft --auto MultiFasta.fasta > output.aln
```

# Inferring phylogenetic tree by IQ-TREE

```
iqtree2 -s output.aln -m MFP -bb 1000
```
