# Supplementary material for: Dynamic diversity of SARS-CoV-2 genetic mutations in a lung transplantation patient with persistent COVID-19
Source: PubMed Central journal article supplement (PMC11058237; doi:10.1038/s41467-024-47941-x), 2024-04-29
Supplement: 41467_2024_47941_MOESM3_ESM.pdf [file 41467_2024_47941_MOESM3_ESM.pdf]

## Reporting Summary

Nature Portfolio wishes to improve the reproducibility of the work that we publish. This form provides structure for consistency and transparency in reporting. For further information on Nature Portfolio policies, see our [Editorial Policies](#) and the [Editorial Policy Checklist](#).

### Statistics

For all statistical analyses, confirm that the following items are present in the figure legend, table legend, main text, or Methods section.

n/a Confirmed

- The exact sample size ( $n$ ) for each experimental group/condition, given as a discrete number and unit of measurement
- A statement on whether measurements were taken from distinct samples or whether the same sample was measured repeatedly
- The statistical test(s) used AND whether they are one- or two-sided  
*Only common tests should be described solely by name; describe more complex techniques in the Methods section.*
- A description of all covariates tested
- A description of any assumptions or corrections, such as tests of normality and adjustment for multiple comparisons
- A full description of the statistical parameters including central tendency (e.g. means) or other basic estimates (e.g. regression coefficient) AND variation (e.g. standard deviation) or associated estimates of uncertainty (e.g. confidence intervals)
- For null hypothesis testing, the test statistic (e.g.  $F$ ,  $t$ ,  $r$ ) with confidence intervals, effect sizes, degrees of freedom and  $P$  value noted  
*Give  $P$  values as exact values whenever suitable.*
- For Bayesian analysis, information on the choice of priors and Markov chain Monte Carlo settings
- For hierarchical and complex designs, identification of the appropriate level for tests and full reporting of outcomes
- Estimates of effect sizes (e.g. Cohen's  $d$ , Pearson's  $r$ ), indicating how they were calculated

*Our web collection on [statistics for biologists](#) contains articles on many of the points above.*

### Software and code

Policy information about [availability of computer code](#)

Data collection

No software was used for data collection

Data analysis

Whole-genome sequencing  
 fastp (version 0.23.2, <https://github.com/OpenGene/fastp>)  
 bwa (version: 0.7.17-r1188, <https://github.com/lh3/bwa>)  
 iVar (version 1.4, <https://andersen-lab.github.io/ivar/html/index.html>)  
 Phylogenetic analysis  
 MAFFT (version 7, <https://mafft.cbrc.jp/alignment/software/>)  
 IQ-TREE (version 2.2.6, <http://www.iqtree.org>)  
 iTOL (version 6.8.1, <https://itol.embl.de>)  
 Dose-response analysis for RDV resistance experiment  
 R (version 4.2.2, <https://www.r-project.org>)  
 drc package (version 3.0-1, <https://cran.r-project.org/web/packages/drc/index.html>)  
 Three-dimensional structure analysis  
 Molecular Operating Environment (MOE), version 2016.08 (CCG Inc, Montreal, Canada) is commercially available. (<https://www.chemcomp.com/index.htm>)

For manuscripts utilizing custom algorithms or software that are central to the research but not yet described in published literature, software must be made available to editors and reviewers. We strongly encourage code deposition in a community repository (e.g. GitHub). See the Nature Portfolio [guidelines for submitting code & software](#) for further information.

## Data

Policy information about [availability of data](#)

All manuscripts must include a [data availability statement](#). This statement should provide the following information, where applicable:

- Accession codes, unique identifiers, or web links for publicly available datasets
- A description of any restrictions on data availability
- For clinical datasets or third party data, please ensure that the statement adheres to our [policy](#)

Consensus sequence data are available from GISAID: the accession numbers, EPI\_ISL\_18261614–EPI\_ISL\_18261621. In addition, fastq files were also uploaded to NCBI Sequence Read Archive: BioProject number, PRJNA983865 (BioSample accession numbers, SAMN35736960–SAMN35736967).

All the software(s) used in our study are freely available through the following sites except Molecular Operating Environment (MOE).

### Whole-genome sequencing

fastp (version 0.23.2, <https://github.com/OpenGene/fastp>)  
 bwa (version: 0.7.17-r1188, <https://github.com/lh3/bwa>)  
 iVar (version 1.4, <https://andersen-lab.github.io/ivar/html/index.html>)

### Phylogenetic analysis

MAFFT (version 7, <https://mafft.cbrc.jp/alignment/software/>)  
 IQ-TREE (version 2.2.6, <http://www.iqtree.org>)  
 iTOL (version 6.8.1, <https://itol.embl.de>)

### Dose-response analysis for RDV resistance experiment

R (version 4.2.2, <https://www.r-project.org>)  
 drc package (version 3.0-1, <https://cran.r-project.org/web/packages/drc/index.html>)

Molecular Operating Environment (MOE), version 2016.08 (CCG Inc, Montreal, Canada) is commercially available. (<https://www.chemcomp.com/index.htm>)

## Research involving human participants, their data, or biological material

Policy information about studies with [human participants or human data](#). See also policy information about [sex, gender \(identity/presentation\), and sexual orientation](#) and [race, ethnicity and racism](#).

|                                                                    |                                                                                                                                                                                                                                                                                                         |
|--------------------------------------------------------------------|---------------------------------------------------------------------------------------------------------------------------------------------------------------------------------------------------------------------------------------------------------------------------------------------------------|
| Reporting on sex and gender                                        | We do not write for avoiding identifying the person.                                                                                                                                                                                                                                                    |
| Reporting on race, ethnicity, or other socially relevant groupings | We do not write for avoiding identifying the person.                                                                                                                                                                                                                                                    |
| Population characteristics                                         | A person at the age of 50s after lung transplantation                                                                                                                                                                                                                                                   |
| Recruitment                                                        | This case was a chronic persistent infection of COVID-19 after lung transplantation and his virus revealed a dynamic genetic diversity with many amino acid mutations involving remdesivir resistance in a clinical course. Therefore we decided to report as a case report with various analytic data. |
| Ethics oversight                                                   | The Research Ethics Committees of Graduate School of Medicine, Chiba University                                                                                                                                                                                                                         |

Note that full information on the approval of the study protocol must also be provided in the manuscript.

## Field-specific reporting

Please select the one below that is the best fit for your research. If you are not sure, read the appropriate sections before making your selection.

- Life sciences       Behavioural & social sciences       Ecological, evolutionary & environmental sciences

For a reference copy of the document with all sections, see [nature.com/documents/nr-reporting-summary-flat.pdf](https://www.nature.com/documents/nr-reporting-summary-flat.pdf)

## Life sciences study design

All studies must disclose on these points even when the disclosure is negative.

|                 |                                                                                                                                                                                                                     |
|-----------------|---------------------------------------------------------------------------------------------------------------------------------------------------------------------------------------------------------------------|
| Sample size     | One. Because this paper is a case report of chronic persistent infection of COVID-19 after lung transplantation.                                                                                                    |
| Data exclusions | No. This study is a case report. Therefore there were no cases of exclusion.                                                                                                                                        |
| Replication     | All the assays to confirm SARS-CoV-2 pathogenicity, SARS-CoV-2 growth kinetics and remdesivir resistance were conducted three times. The whole genome sequence of every isolated SARS-CoV-2 was conducted one time. |

Randomization

Blinding

## Reporting for specific materials, systems and methods

We require information from authors about some types of materials, experimental systems and methods used in many studies. Here, indicate whether each material, system or method listed is relevant to your study. If you are not sure if a list item applies to your research, read the appropriate section before selecting a response.

### Materials & experimental systems

| n/a                                 | Involvement in the study                                  |
|-------------------------------------|-----------------------------------------------------------|
| <input checked="" type="checkbox"/> | <input type="checkbox"/> Antibodies                       |
| <input type="checkbox"/>            | <input checked="" type="checkbox"/> Eukaryotic cell lines |
| <input checked="" type="checkbox"/> | <input type="checkbox"/> Palaeontology and archaeology    |
| <input checked="" type="checkbox"/> | <input type="checkbox"/> Animals and other organisms      |
| <input type="checkbox"/>            | <input checked="" type="checkbox"/> Clinical data         |
| <input checked="" type="checkbox"/> | <input type="checkbox"/> Dual use research of concern     |
| <input checked="" type="checkbox"/> | <input type="checkbox"/> Plants                           |

### Methods

| n/a                                 | Involvement in the study                        |
|-------------------------------------|-------------------------------------------------|
| <input checked="" type="checkbox"/> | <input type="checkbox"/> ChIP-seq               |
| <input checked="" type="checkbox"/> | <input type="checkbox"/> Flow cytometry         |
| <input checked="" type="checkbox"/> | <input type="checkbox"/> MRI-based neuroimaging |

## Eukaryotic cell lines

Policy information about [cell lines and Sex and Gender in Research](#)

Cell line source(s)

Authentication

Mycoplasma contamination

Commonly misidentified lines (See [ICLAC](#) register)

## Clinical data

Policy information about [clinical studies](#)

All manuscripts should comply with the ICMJE [guidelines for publication of clinical research](#) and a completed [CONSORT checklist](#) must be included with all submissions.

Clinical trial registration

Study protocol

Data collection

Outcomes

## Plants

Seed stocks

Novel plant genotypes

Authentication
